# Supplementary material
Source: publisher figshare collection journal article supplement (https://karger.figshare.com/articles/dataset/_/5127817)
Supplement: Supplementary file 1 [file 1 › 000381262_sm_Figure 1.pdf]

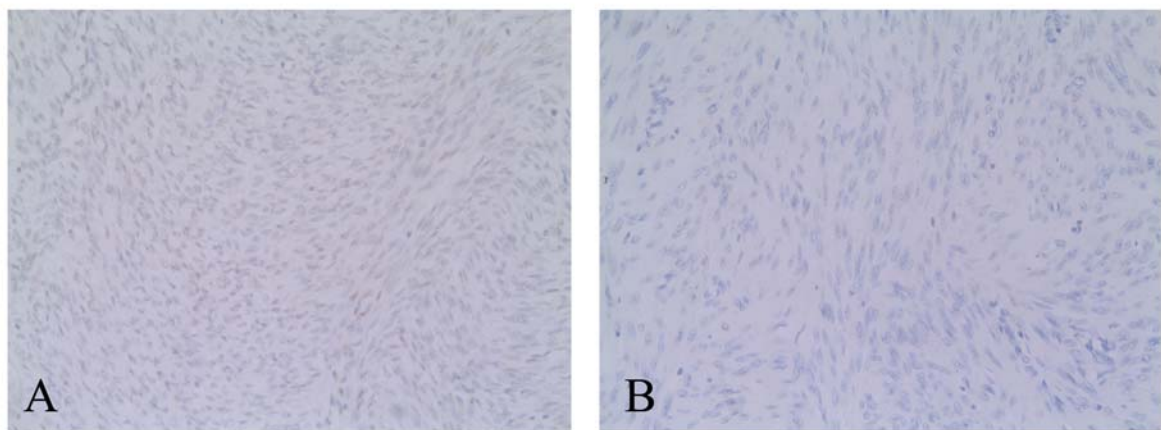

Supplementary Fig 1. Immunohistochemical analysis of leiomyomas using (a) p53,  $\times 200$ ; (b) as the control,  $\times 200$ .
