# Supplementary material
Source: publisher figshare collection journal article supplement (https://karger.figshare.com/articles/dataset/_/5127817)

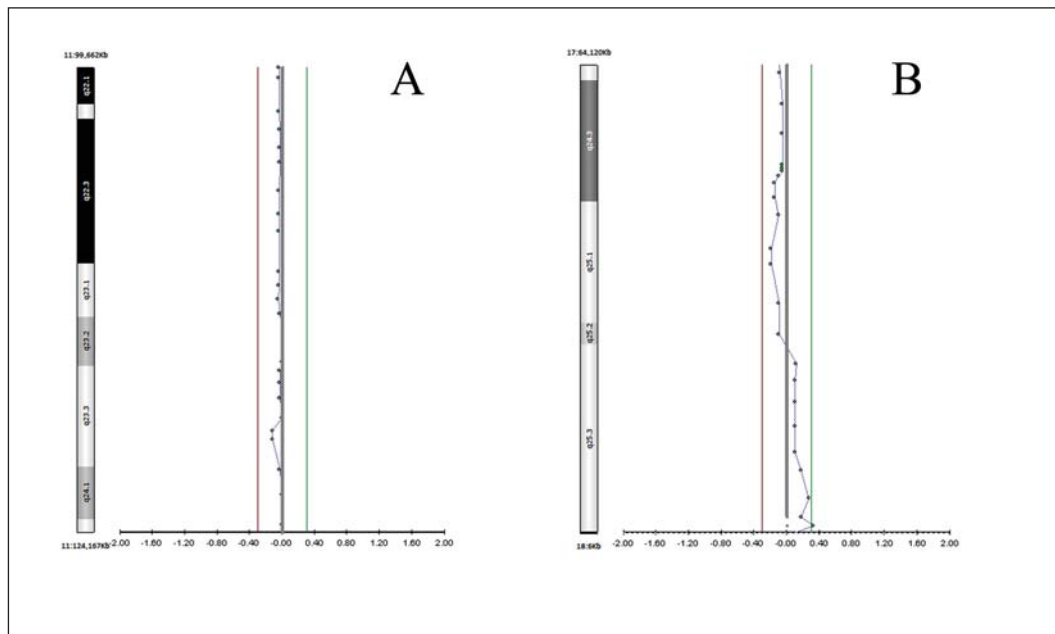

Supplementary Fig 2. The magnified aCGH results of Chr11 q23 (a) and Chr17 q25 (b).

Supplement: Supplementary file 1 [file 1 › 000381262_sm_Figure 2.pdf]
